# Supplementary material
Source: Springer Nature journal article supplement (https://www.springermedizin.de/resource/supplementary/13034_2008_67_MOESM2_ESM.pdf/9652246)

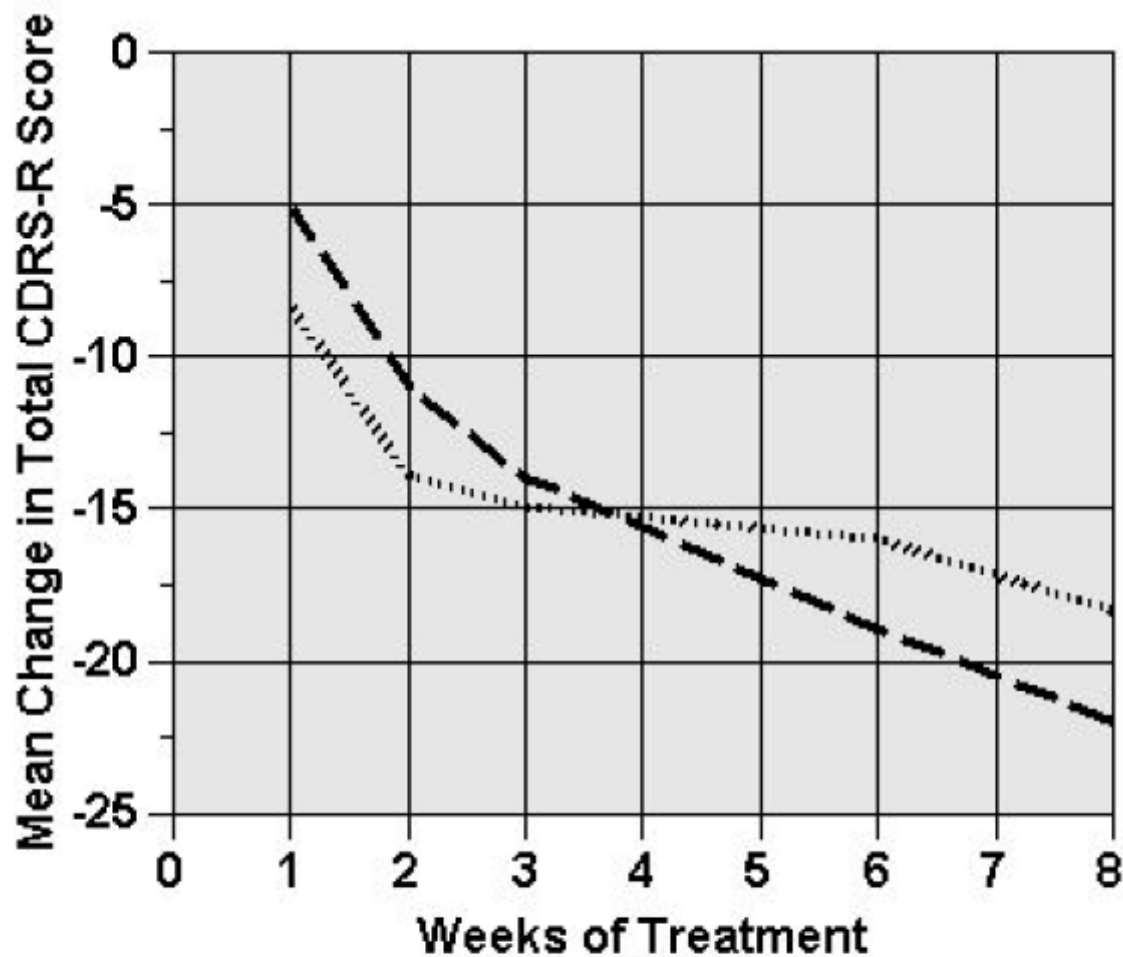

..... Fluoxetine (N=18)

----- Placebo (N=16)

Supplement: MOESM2 [file 9652246]
